# Supplementary material for: Epidemiology of Simultaneous Medullary and Papillary Thyroid Carcinomas (MTC/PTC): An Italian Multicenter Study
Source: MDPI journal article supplement (doi:10.3390/cancers11101516), 2019-10-09
Supplement: s1 [file s1]

# Supplementary Materials: Epidemiology of Simultaneous Medullary and Papillary Thyroid Carcinomas (MTC/PTC): An Italian, Multicenter Study

Marialuisa Appetecchia, Rosa Laretta, Agnese Barnabei, Letizia Pieruzzi, Irene Terrenato, Elisabetta Cavedon, Caterina Mian, Maria Grazia Castagna, Rossella Elisei; on behalf of the SIE (Italian Society of Endocrinology) Working Group

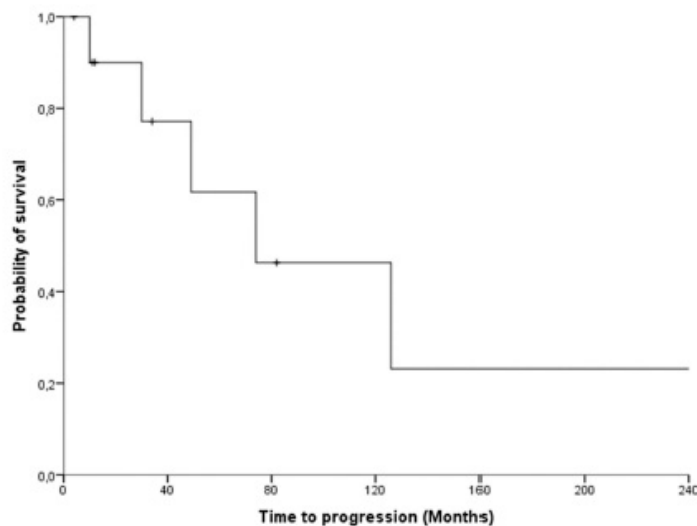

Median time to progression 74 months, 95%CI 0-148

(A)

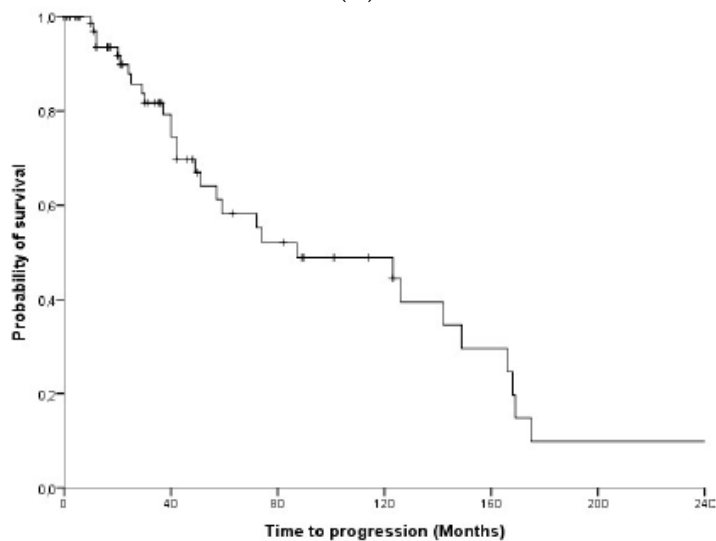

Median time to progression 87 months, 95%CI 11.5-162.5

(B)

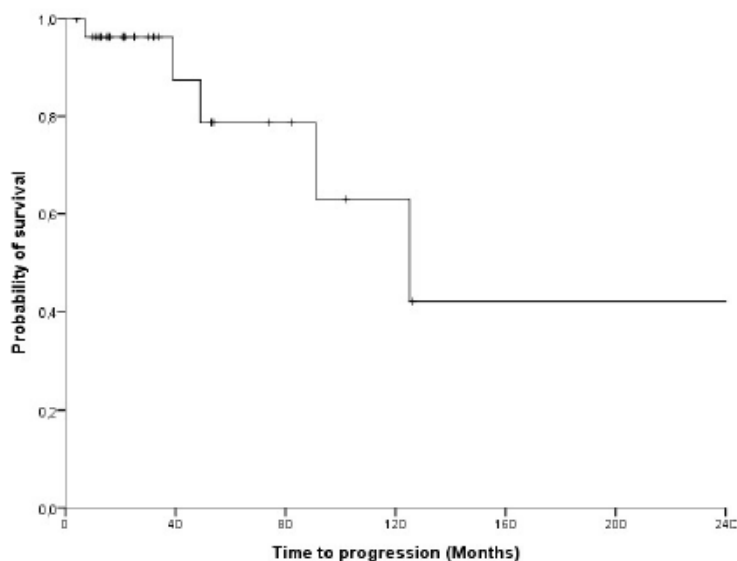

Median time to progression 125 months, 95% CI 59.9-190.8

(C)

Figure S1. Analysis of survival by tumor size. Panel (A) Both PTC and MTC >1 cm (N = 11). Panel (B) MTC >1 cm (N = 78). Panel (C) PTC>1 cm (N = 27).

Table S1. Cancer site of the 21 patients who had concomitant cancer comorbidity.

| Patient | 1st Cancer               | 2nd Cancer    |
|---------|--------------------------|---------------|
| 1       | Prostate                 | Colon         |
| 2       | Breast                   |               |
| 3       | Breast                   |               |
| 4       | Breast                   |               |
| 5       | Breast                   |               |
| 6       | Breast                   | Melanoma      |
| 7       | Kidney                   | Bowel         |
| 8       | Melanoma                 |               |
| 9       | Pheochromocytoma         |               |
| 10      | Pheochromocytoma         |               |
| 11      | Pheochromocytoma         |               |
| 12      | Prostate                 |               |
| 13      | Lymphoma                 |               |
| 14      | Leukemia (pediatric age) |               |
| 15      | Melanoma                 |               |
| 16      | Melanoma                 |               |
| 17      | Mesothelioma             | Pancreas      |
| 18      | Multiple myeloma         |               |
| 19      | Breast                   | Neuroblastoma |
| 20      | Kidney                   |               |
| 21      | Sarcoma Ewing            |               |

Table S2. RET mutations.

| RET     | N  | %    | Germinal * |
|---------|----|------|------------|
| RET (-) | 88 | 48.1 |            |
| RET (+) | 24 | 13,1 |            |
| unknown | 6  | 25,0 |            |
| A883F   | 1  | 4,2  | 1          |
| C620S   | 2  | 8,3  | 1          |
| C630T   | 1  | 4,2  |            |

|                     |    |      |   |
|---------------------|----|------|---|
| <i>del631E</i>      | 1  | 4,2  |   |
| <i>E632_I638del</i> | 1  | 4,2  |   |
| <i>M918T</i>        | 2  | 8,3  | 1 |
| <i>D898_E901del</i> | 1  | 4,2  |   |
| <i>S891A</i>        | 1  | 4,2  |   |
| <i>V804M</i>        | 8  | 33,3 | 2 |
| <b>RET unknown</b>  | 71 | 38,8 |   |

\* The mutation was germinal in 5/24 subjects (21%) and somatic in the remaining 19 subjects.

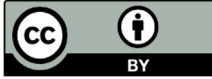

© 2019 by the authors. Licensee MDPI, Basel, Switzerland. This article is an open access article distributed under the terms and conditions of the Creative Commons Attribution (CC BY) license (<http://creativecommons.org/licenses/by/4.0/>).
